# Supplementary material
Source: publisher figshare collection journal article supplement (https://tandf.figshare.com/articles/dataset/_/11292644)
Supplement: Supplementary file 2 [file 1]

Archive with 11 entries (11 files):
- SFigure 1.pdf
- SFigure 2.pdf
- SFigure 3.pdf
- SFigure 4.pdf
- SFigure 5.pdf
- SFigure 6.pdf
- SFigure 7.pdf
- STable 1.pdf
- STable 2 and 3.pdf
- STable 4.pdf
- Supplementary figures.docx
