# Supplementary material
Source: publisher figshare collection journal article supplement (https://tandf.figshare.com/articles/dataset/_/11292644)
Supplement: Supplementary file 2 [file 1 › SFigure 7.pdf]

Supplementary Figure S7

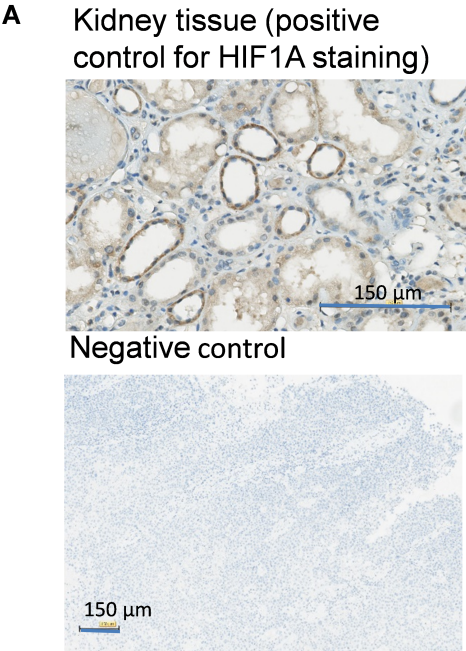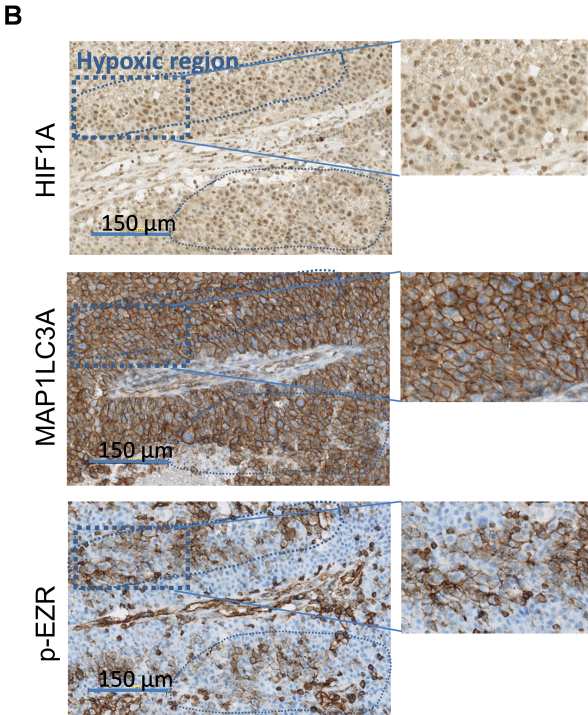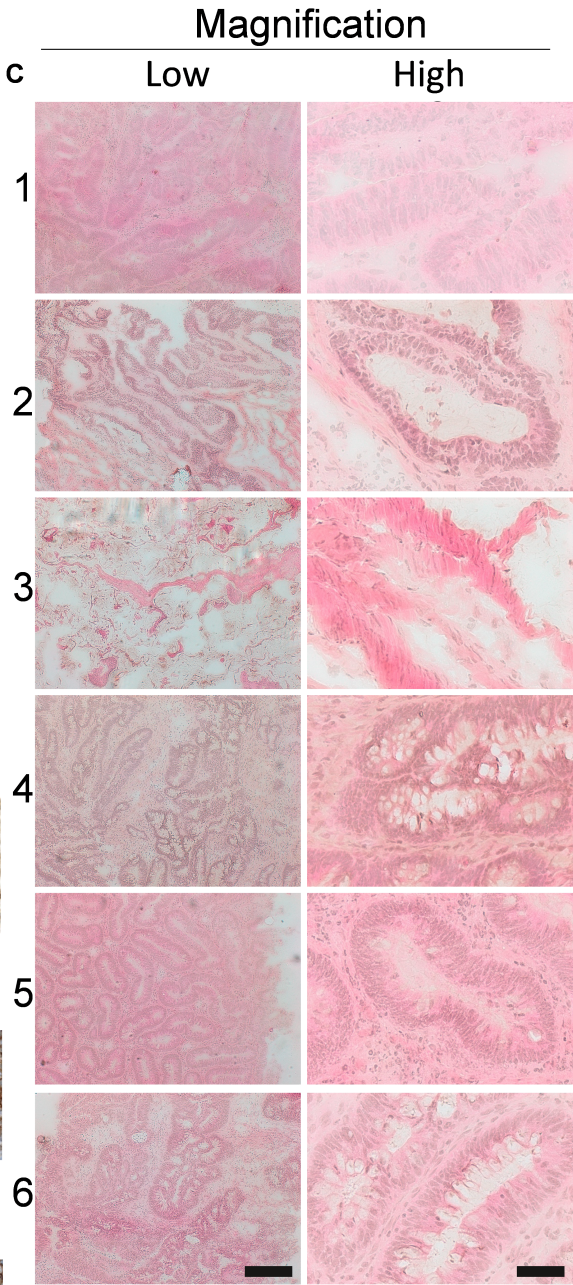

| patient | age | gender | tumor grade | tnm stage |
|---------|-----|--------|-------------|-----------|
| 1       | 83  | female | G3          | 3         |
| 2       | 62  | female | G2          | 3         |
| 3       | 76  | female | G2          | 2a        |
| 4       | 74  | female | G2          | 3         |
| 5       | 82  | female | G1          | 1         |
| 6       | 65  | male   | G1          | 2a        |
