# Supplementary material
Source: publisher figshare collection journal article supplement (https://tandf.figshare.com/articles/dataset/_/11292644)
Supplement: Supplementary file 2 [file 1 › STable 1.pdf]

## Supplementary Table 1

**Table S1.** Sphere forming cell (SFC) frequency determined by limiting dilution analysis

|                     |           | P1                   |          |       | P2                   |          |       | P3                   |          |       |
|---------------------|-----------|----------------------|----------|-------|----------------------|----------|-------|----------------------|----------|-------|
| Colon cancer sample | Condition | TIC frequency 1 in x |          |       | TIC frequency 1 in x |          |       | TIC frequency 1 in x |          |       |
|                     |           | Lower                | Estimate | Upper | Lower                | Estimate | Upper | Lower                | Estimate | Upper |
| T6                  | N         | 12.19                | 9.14     | 6.85  | 11.46                | 7.51     | 4.92  | 20.10                | 11.66    | 6.77  |
|                     | H 1%      | 4.19                 | 3.39     | 2.75  | 4.45                 | 3.24     | 2.36  | 8.35                 | 5.43     | 3.53  |
| T18                 | N         | 13.09                | 8.47     | 5.48  | 7.15                 | 4.54     | 2.88  | 6.32                 | 4.45     | 3.13  |
|                     | H 1%      | 5.33                 | 3.62     | 2.46  | 2.86                 | 2.00     | 1.39  | 3.13                 | 2.38     | 1.81  |
| T20                 | N         | 1.78                 | 1.57     | 1.40  | 3.15                 | 2.03     | 1.43  | 2.09                 | 1.75     | 1.49  |
|                     | H 1%      | 1.50                 | 1.34     | 1.22  | 1.66                 | 1.29     | 1.10  | 1.63                 | 1.39     | 1.22  |
| XT18                | N         | 20.2                 | 12.95    | 8.30  | 9.96                 | 6.35     | 4.06  | 6.26                 | 3.70     | 2.19  |
|                     | H 1%      | 9.7                  | 6.76     | 4.71  | 3.50                 | 2.51     | 1.80  | 2.82                 | 1.87     | 1.24  |

ELDA: Extreme Limiting Dilution Analysis, SFC frequency 1 in x, x= number of colon cancer cells
