# Supplementary material
Source: publisher figshare collection journal article supplement (https://tandf.figshare.com/articles/dataset/_/11292644)
Supplement: Supplementary file 2 [file 1 › STable 2 and 3.pdf]

## Supplementary Table 2

**Table S2.** Ingenuity Pathway Analysis (IPA) – Top enriched and activated pathways after 7 days hypoxia treatment of patient T18-derived TICs. Significant p-values are indicated, a pathway is predicted to be active at a z-score > 2. Data are based on microarrays (E-MTAB-7354).

| Pathways       | P-value  | Predicted activation | Activation z-score |
|----------------|----------|----------------------|--------------------|
| Autophagy      | 5.61E-05 | Increased            | 2.567              |
| Cell migration | 3.76E-03 | Increased            | 4.592              |
| Cell invasion  | 1.96E-05 | Increased            | 3.249              |
| Cell viability | 1.83E-07 | Increased            | 1.920              |

## Supplementary Table 3

**Table S3.** Top candidate phospho-proteins identified with fold change (FC) < 0.50 or FC>2.0 in T18 TICs

| Phospho-proteins of interest     | Fold changes     |                           |
|----------------------------------|------------------|---------------------------|
|                                  | Hypoxia/Normoxia | shATG5<br>Hypoxia/Hypoxia |
| PIK3R1/3 (Phospho-Tyr467/Tyr199) | 2.87             | 0.58                      |
| <b>EZR (Phospho-Thr567)</b>      | <b>2.32</b>      | <b>0.39</b>               |
| BLNK (Phospho-Tyr84)             | 2.26             | 0.45                      |
| ATF2 (Phospho-Thr69/51)          | 2.12             | 0.43                      |
| BCL2 (Phospho-Ser87)             | 2.08             | 0.47                      |
| CDKN1B (Phospho-Ser10)           | 2.03             | 0.63                      |
| KCNA3/Kv1.3 (Phospho-Tyr135)     | 1.95             | 0.53                      |
| IKBKB (Phospho-Tyr188)           | 2.03             | 0.63                      |
| MDM4 (Phospho-Ser367)            | 0.56             | 2.21                      |
| RET (Phospho-Tyr905)             | 0.53             | 1.94                      |
| AKT1 (Phospho-Thr450)            | 0.51             | 2.62                      |
