# Supplementary material
Source: publisher figshare collection journal article supplement (https://tandf.figshare.com/articles/dataset/_/11292644)
Supplement: Supplementary file 2 [file 1 › STable 4.pdf]

# Supplementary Table 4

| Table S4. Primer pairs used for RT-qPCR |                                       |                                      |
|-----------------------------------------|---------------------------------------|--------------------------------------|
| Gene                                    | Forward                               | Reverse                              |
| <i>ATG5</i>                             | 5'-GCA-GAT-GGA-CAG-TTG-CAC-ACA-C-3'   | 5'-GAG-GTG-TTT-CCA-ACA-TTG-GCT-CA-3' |
| <i>BECN1</i>                            | 5'-GGA-TGG-TGT-CTC-GCA-GAT-3'         | 5'-TTG-GCA-CTT-TCT-GTG-GAC-AT-3'     |
| <i>BNIP3</i>                            | 5'-GAA-TTT-CTG-AAA-GTT-TTC-CTT-CCA-3' | 5'-ACGCCTTCCAATATAGATC-3'            |
| <i>BNIP3L</i>                           | 5'-TGT-GGA-AAT-GCA-CAC-CAG-CAG-G-3'   | 5'-CTA-CTG-GAC-CAG-TCT-GAT-ACC-C-3'  |
| <i>EFF1A1</i>                           | 5'-TTG-TCG-TCA-TTG-GAC-ACG-TAG-3'     | 5'-TGC-CAC-CGC-ATT-TAT-AGA-TCA-G-3'  |
| <i>YWHAZ</i>                            | 5'-ACT-TTT-GGT-ACA-TTG-TGG-CTT-CAA-3' | 5'-CCG-CCA-GGA-CAA-ACC-AGT-AT-3'     |
