# Supplementary material
Source: publisher figshare collection journal article supplement (https://tandf.figshare.com/articles/dataset/_/11292644)
Supplement: Supplementary file 2 [file 1 › Supplementary figures.docx]

**Figure S1.** Hypoxia stops the proliferation of differentiated CRC cells but not TICs. (**A**) Differentiated counterparts of T6-, T18-, and T20-derived TICs (T6D, T18D and T20D), were maintained under 1% O2 levels for 7 d and confluence was assessed daily. Cells stopped proliferation under hypoxic conditions after 3-4 d. Representative figure of three independent experiments, **p<0.01, ***p<0.001, ns=not significant. (**B**) Hypoxia does not lead to an increase in apoptosis of patient-derived TICs. TdT-mediated dUTP Nick-End Labeling (TUNEL) assay of TICs (T6, T18, and T20) exposed to 1% oxygen levels (H) and normal oxygen levels (N) over three and 7 d, respectively. Scale bar: 100 μm. (**C**) Quantification of B, total cell number (130 cells were counted for each condition) and TUNEL-positive cells were counted after 7 d. Representative figure of two independent experiments, ns=not significant, data are presented as mean±SD. (**D**) Hypoxia treatment does not induce proliferation in TICs as measured by sphere size. Representative figure of at least three independent experiments, ns=not significant. (**E**) Sphere size for individual spheres over five passages (P) of 10 d each is shown for both conditions. The number of measured spheres is indicated in the bars. Results for TICs derived from patient T6 are shown; similar results were obtained for patients T18- and T20-derived TICs (data not shown).

**Figure S2.** Hypoxic treatment is the main source of variation in gene expression profiling of patient T18-derived TICs (E-MTAB-7354). (**A**)Principal component analysis (PCA) of gene expression profiling data of TICs derived from patient T18 which were maintained under normoxic (blue) and hypoxic (red) conditions for three (72 h, squares, data not shown in the current manuscript) and 7 d (pyramids), respectively.PCA was performed using Log2 expression data. Each dot on the graph corresponds to an array experiment. (**B**)Average F-ratio for the effect of different factors on the variability of the transcriptome data (ANOVA analysis). Factors or sources of variation are represented in x-axis where: “Hypoxia” is the hypoxic treatment and “Time” is the time of TIC treatment. (**C**) *BNIP3* and *BNIP3L* are upregulated in a HIF1A-dependent manner in hypoxic TICs, with the representative figure representing at least two independent experiments per TIC culture. Data are presented as mean ± SD, **p<0.01, ***p<0.001. (**D**) Relapse-free CRC patient survival, according to *BNIP3L* expression in the publicly available dataset GSE17538,*p<0.05.

**Figure S3.** The efficiency of knockdowns. (**A-B**) (**A**) Gene expression and (**B**) protein levels of *ATG5* in the *ATG5*-defective (sh*ATG5*) and control (scr) TICs of patient T6, T18, and T20. Data are representative of at least 4 independent experiments, mean ± SD, *p<0.05, ***p<0.001. (**C**) Gene expressions of *BECN1, BNIP3* and *BNIP3L* in their respective knockdowns and control (scr) conditions for T6-, T18- and T20-derived TICs. Data are presented as mean ± SD and is representative of three independent experiments. (**D**) Protein expression of BECN1 in *BECN1*-defective (sh*BECN1*) and control (scr) in T18-, T6-, and T20-derived TICs. (**E**)Protein expression of BNIP3L (also known as NIX) in *BNIP3L*-defective (sh*BNIP3L*), *BNIP3*-defective (sh*BNIP3*), and control (scr) in T6-, T18- and T20-derived TICs.Note that knockdown of *BNIP3* does not interfere with BNIP3L expression.Representative figure of 4 independent experiments is shown.

**Figure S4.** Signaling pathways downstream of hypoxia. (**A**)Phosphorylation of Ser660 of PRKC in normoxic and hypoxic T18 TICs at different time points. Data is representative of two independent experiments. (**B**) MAPK/ERK and AKT signaling pathways under normoxia and hypoxia in T6 and T18 TIC cultures. Data are representative of three independent experiments. (**C**) Phosphorylation of MAPK14/p38 following EZR inhibition with the small inhibitor NSC305787 in T6 TICs. Data are representative of two independent experiments. (**D**) Sphere size of individual spheres is shown for *ATG5-*defective(sh*ATG5*) and control (scr) TICs under hypoxia (H) or normoxia (N) after 10-14 d. The number of spheres measured for each condition is indicated in the bars. Data are presented as mean ± SD and representative of at least two independent experiments, ns=not significant. (**E**) Colony numbers after 10-14 d of normoxia (N) and hypoxia (H) for control (scr), *BNIP3*-defective (sh*BNIP3*), and *BNIP3L*-defective (sh*BNIP3L*) TICs from patients T6 (**E**), T18 (**F**), and T20 (**G**). Data are presented as a representative figure of at least three independent experiments, mean ± SD, ns=not significant, *p<0.05, **p<0.01, ***p<0.001.

**Figure S5.** EZR inhibition in TICs.(**A**) *ATG5* knockdown in (**A**) T6 and (**B**) T18 TICs via a pool of 3 different target-specific shRNA constructs against EZR. (**C-D**) siRNAs or respective negative control siRNAs from two different companies (**C**) Qiagen and (**D**) Dharmacon were used to inhibit EZR in T18 TICs. EZR expression was assessed at different time points after transfection. (**E-F**) CRISPR/Cas9 technology was used to inhibit EZR in T18 TICs. (**E**) Expression of EZR was still observed after CRISPR/Cas9 EZR lentiviral transduction. (**F**) The DNA was extracted from the single clones and sequenced. As shown for clone 120A (exon5 guide RNA), a deletion in the sequence of the clones was observed. However, we did not observe a STOP codon, which explains the remaining expression of the protein in all the clones. (**G**) CASP3 activity assay in T18 TICs treated with two small inhibitors for EZR (NSC305787 and NSC668349). Data is shown as mean ± SD and representative of 2 independent experiments. (**H**) Phosphorylation of ERM proteins in TICs and differentiated adherent counterparts under hypoxic conditions. (**I**) T18 TICs show high expression of EZR while MSN is much less expressed and RDX expression is absent. HEK-293 cells are used as a control to show the expression of the ERM proteins in adherent cells. (**J**) T18 adherent differentiated cells show phosphorylation of the 3 ERM proteins. After stripping with ß-mercaptoethanol, the different blots were probed with specific antibodies to EZR, MSN, and RDX. Lower panels show the expression of EZR, MSN, and RDX in adherent differentiated cells. (**K**) Colony numbers after 10-14 d of hypoxia and small inhibitor treatment (NSC305787) for T18 TICs. Data are shown as mean ± SD and representative of 3 independent experiments.

**Figure S6.** Reduced tumor growth and weight in immune-deficient CQ-treated mice. (**A**) Weight in immune-deficient mice (NSG mice), 8 weeks after subcutaneous injection of 10.000 cells derived from primary T20 TICs following stable knockdown of *ATG5* or their respective control vector; n = 5/group. (**B**) ATG5 and SQSTM1 expression in extracted xenograft tumors after injection with *ATG5*-silenced T18 TICs and compared with their scrambled control xenografts. (**C**) Weight of serial transplanted T18 tumors from Figure 6G. Tumor incidence for each cell dose is indicated in brackets. Data are shown as mean ± SD for A and B. *p<0.05, **p<0.01, ***p<0.001.

**Figure S7.** Immunohistochemistry of HIF1A, MAP1LC3A, and p-EZR in primary tumor sections. (**A**) Kidney tissue was used as a positive control for HIF1A staining and the negative control (using only the secondary antibody) showed no staining. (**B**) Staining for HIF1A, MAP1LC3A, and p-EZR in tumor sections of two CRC patients, scale bar; 150 µm. (**C**) Hematoxylin and eosin (H&E) staining of the six human CRC samples used in Figure 7, as well as their patient characteristics. Scale bars: 250 µm for the low and 50 µm for the high magnification, respectively.
