# Supplementary material
Source: publisher figshare collection journal article supplement (https://tandf.figshare.com/articles/dataset/_/11292644)

**A**

Normoxia Hypoxia  
1 h 6 h 16 h 1 h 6 h 16 h

p-PRKC

ACTA1

**B**

T6 T18

Normoxia Hypoxia Normoxia Hypoxia  
1 h 6 h 16 h 1 h 6 h 16 h 1 h 6 h 16 h 1 h 6 h 16 h

p-MAPK1

MAPK1/3

HIF1A

TUBA

p-AKT

AKT

TUBA

**C**

N Hypoxia  
NSC305787 - - 0.1 0.25  $\mu$ M

p-MAPK14/p-P38

MAPK14/P38

ACTA1

**D**

T18

sphere size ( $\mu$ m)

scr\_N shATG5\_N scr\_H shATG5\_H

**E**

T6

3D colony numbers

scr scr shBNIP3 shBNIP3L

**F**

T18

3D colony numbers

scr scr shBNIP3 shBNIP3L

**G**

T20

3D colony numbers

scr scr shBNIP3 shBNIP3L

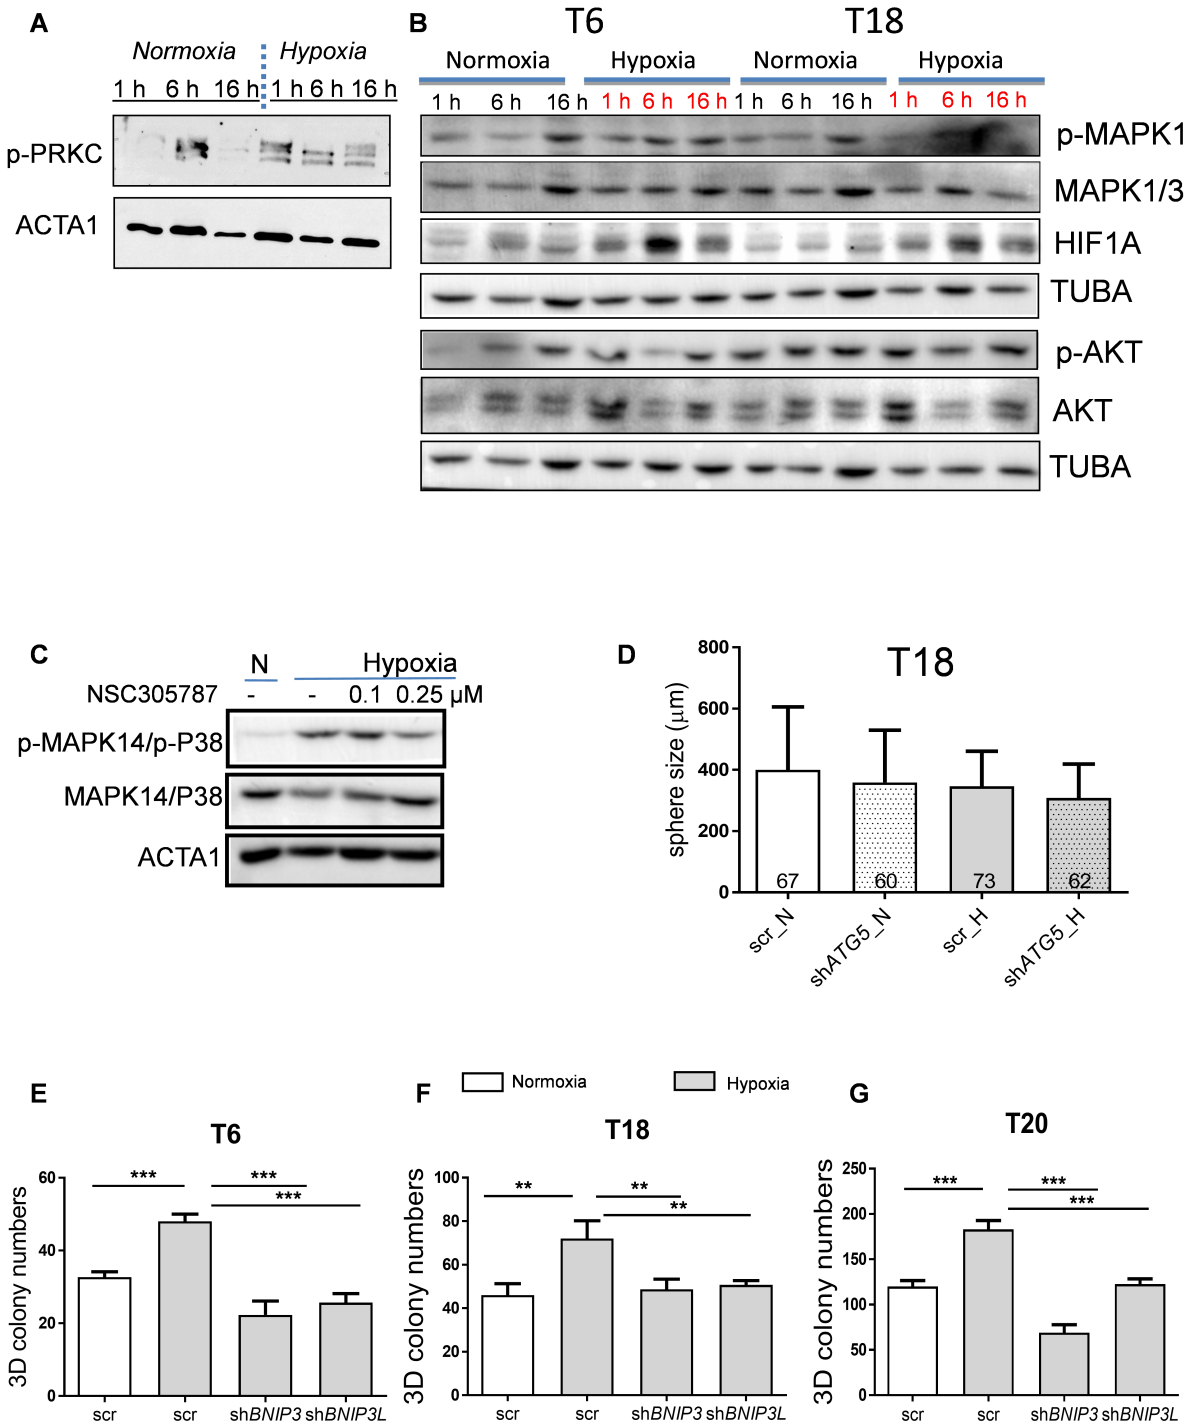

Supplement: Supplementary file 4 [file 1]
