# Supplementary material
Source: publisher figshare collection journal article supplement (https://tandf.figshare.com/articles/dataset/_/11292644)

# Supplementary Figure S1

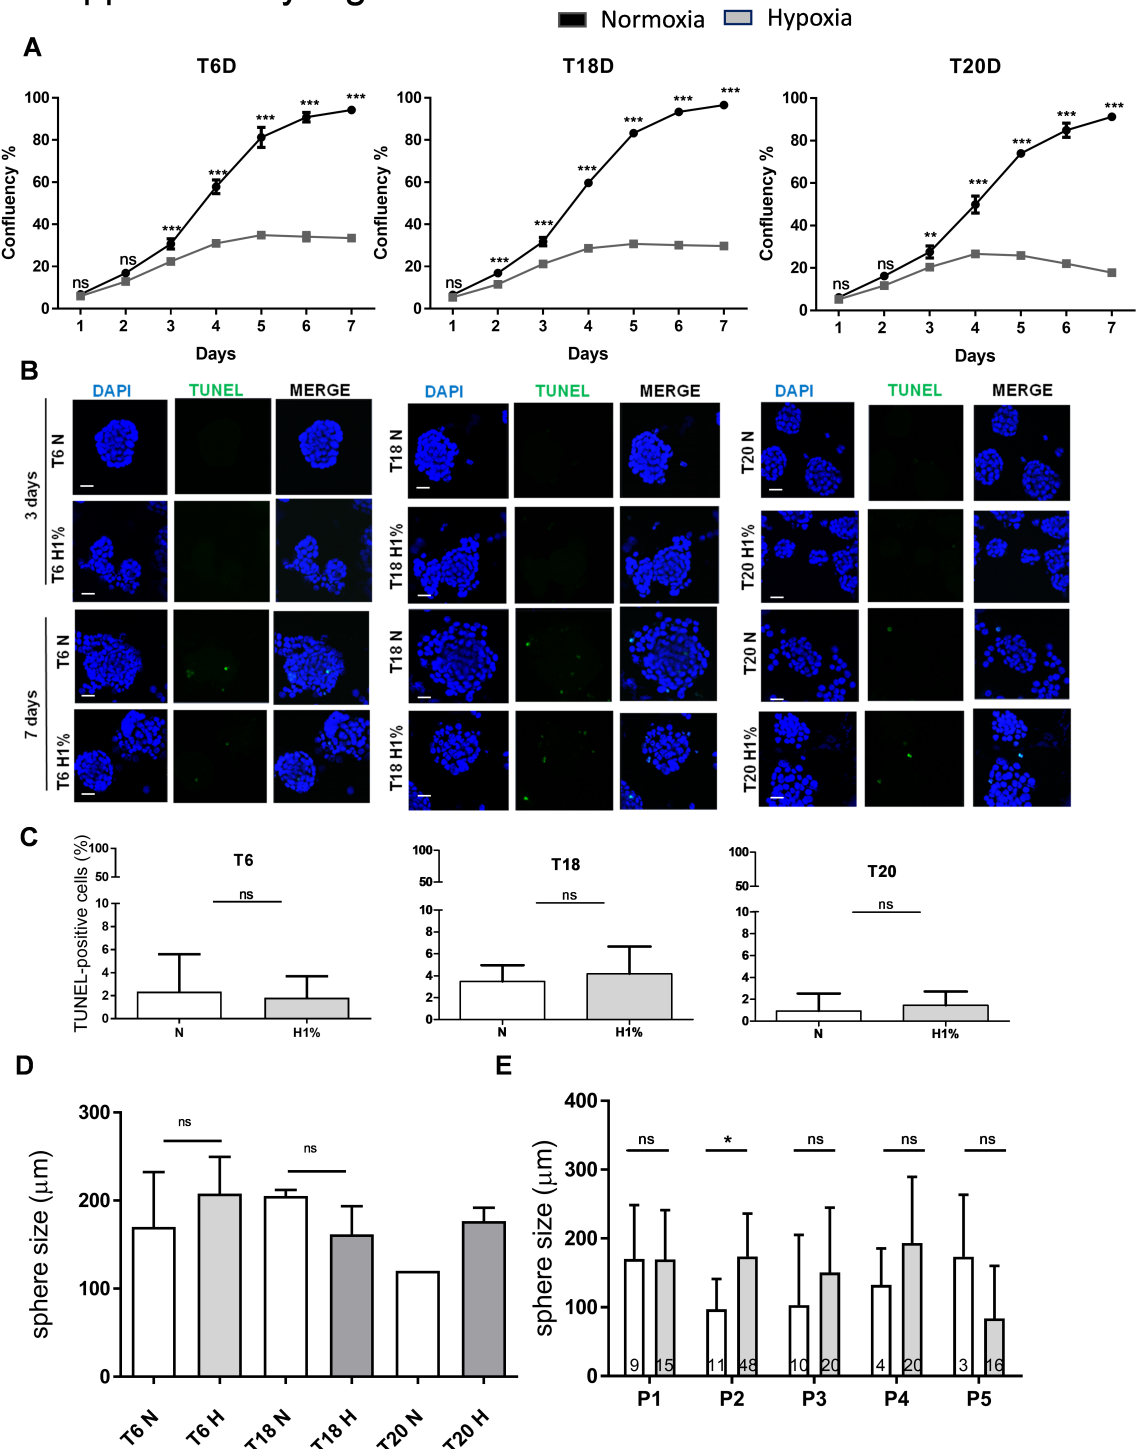

Supplement: Supplementary file 1 [file 1]

# Supplementary Figure S2

**A**

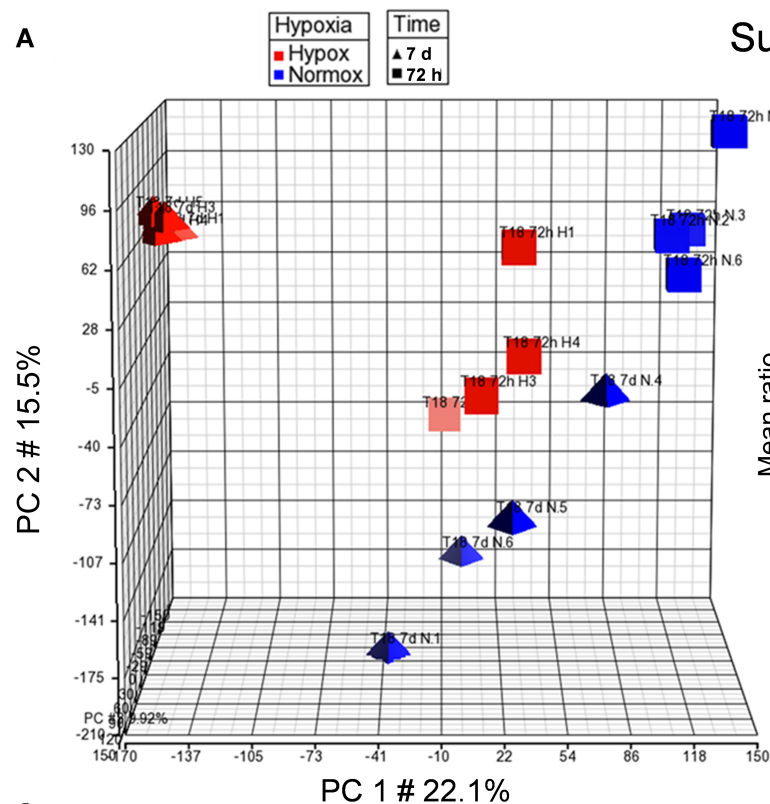

**B**

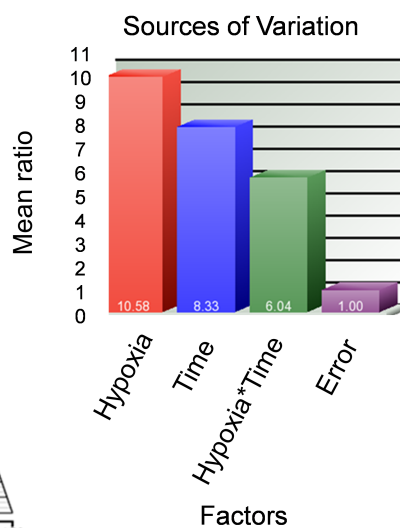

**C**

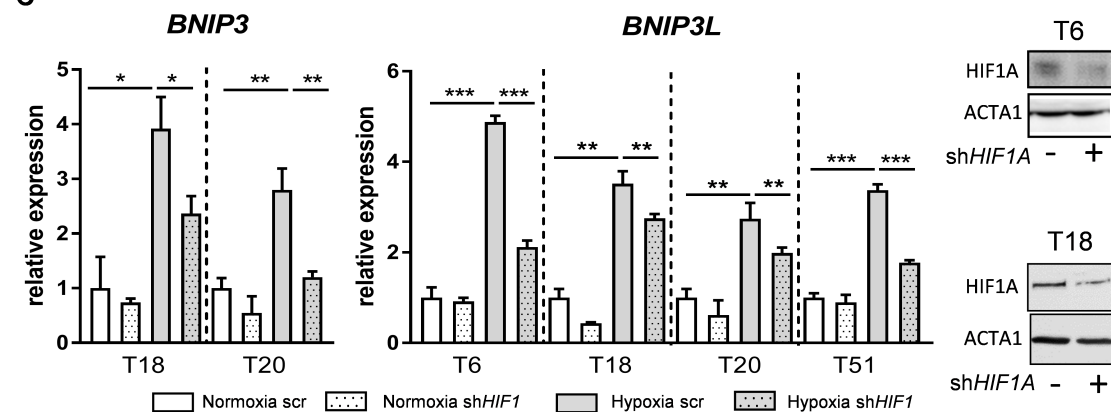

**D**

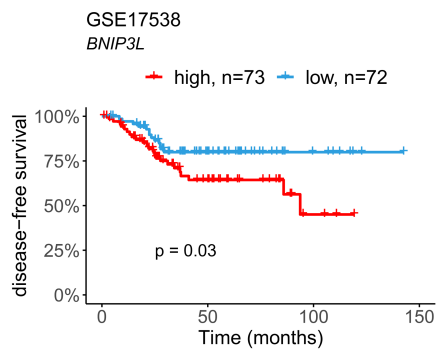

Supplement: Supplementary file 2 [file 1 › SFigure 2.pdf]

Supplementary Figure S3

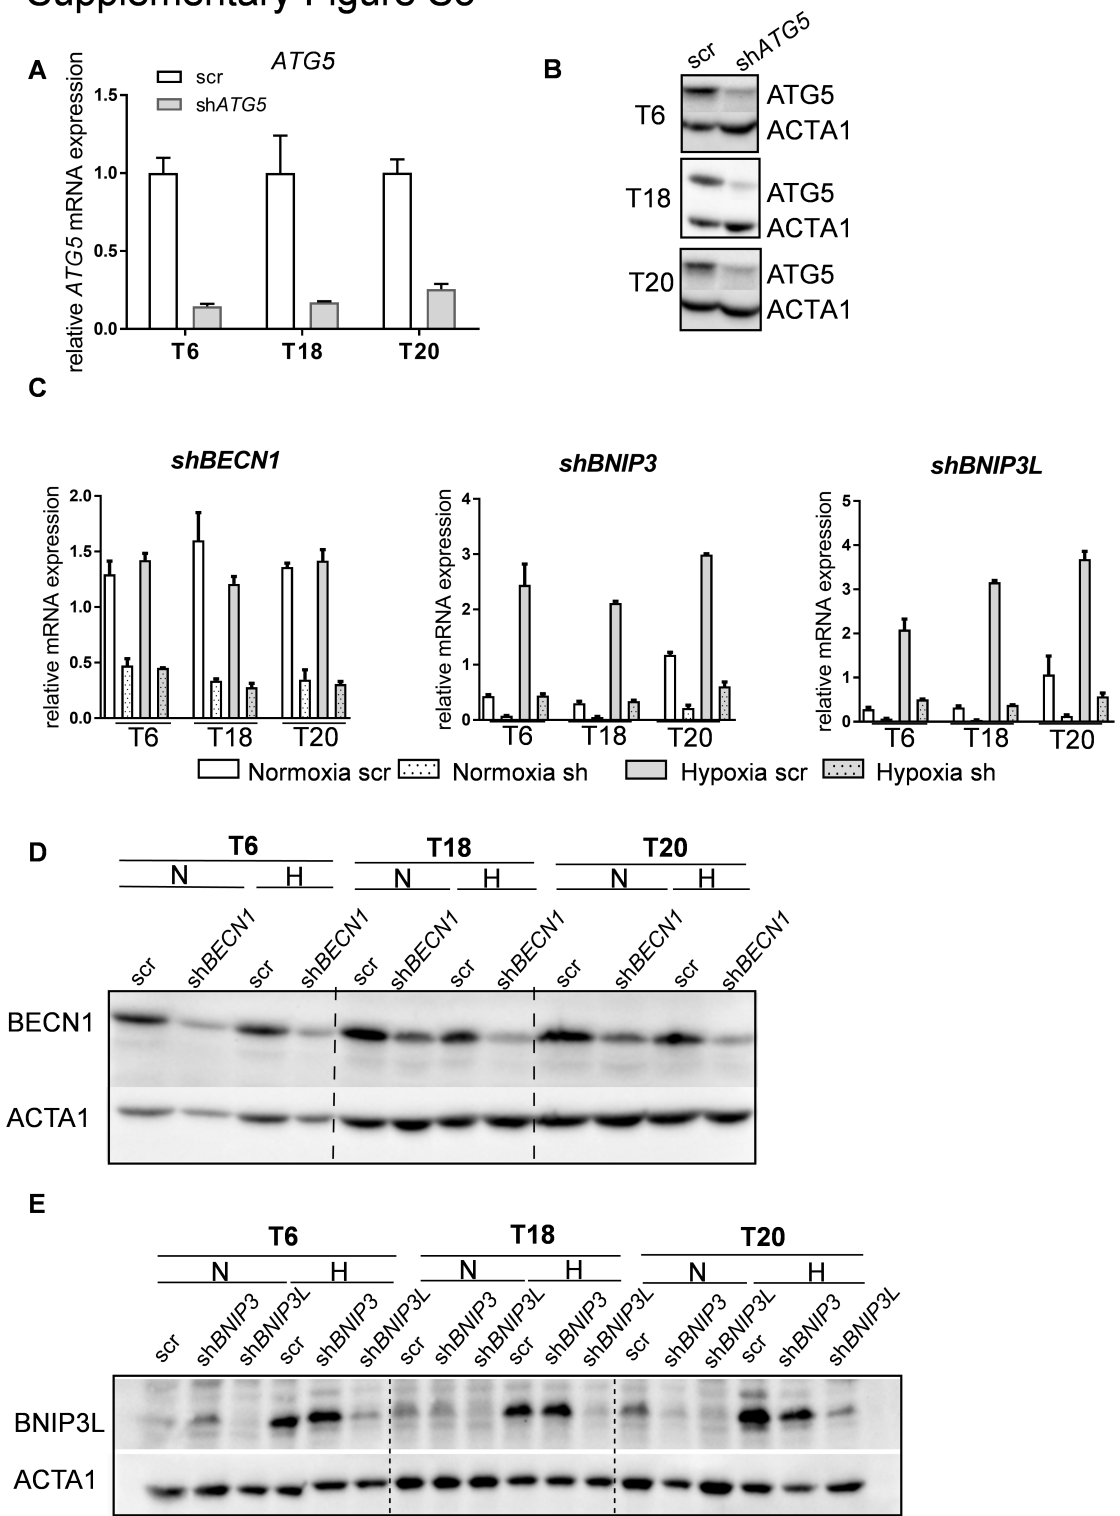

Supplement: Supplementary file 2 [file 1 › SFigure 3.pdf]

## Supplementary Figure S4

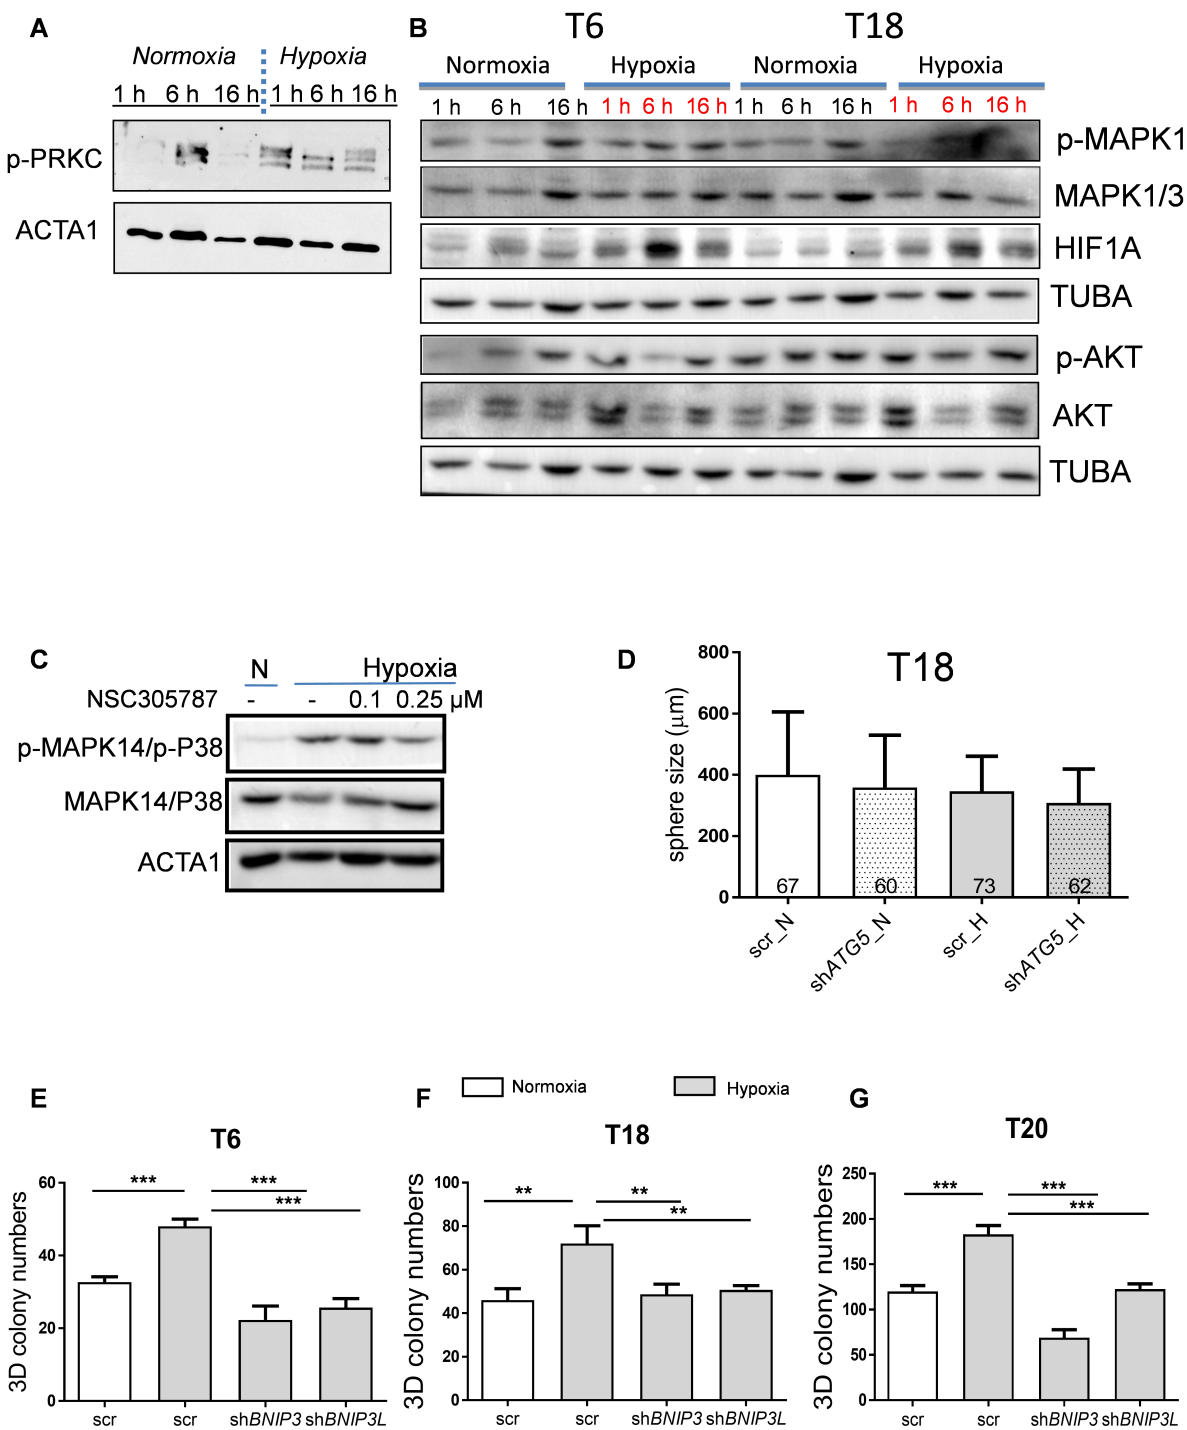

Supplement: Supplementary file 2 [file 1 › SFigure 4.pdf]

Supplementary Figure S5

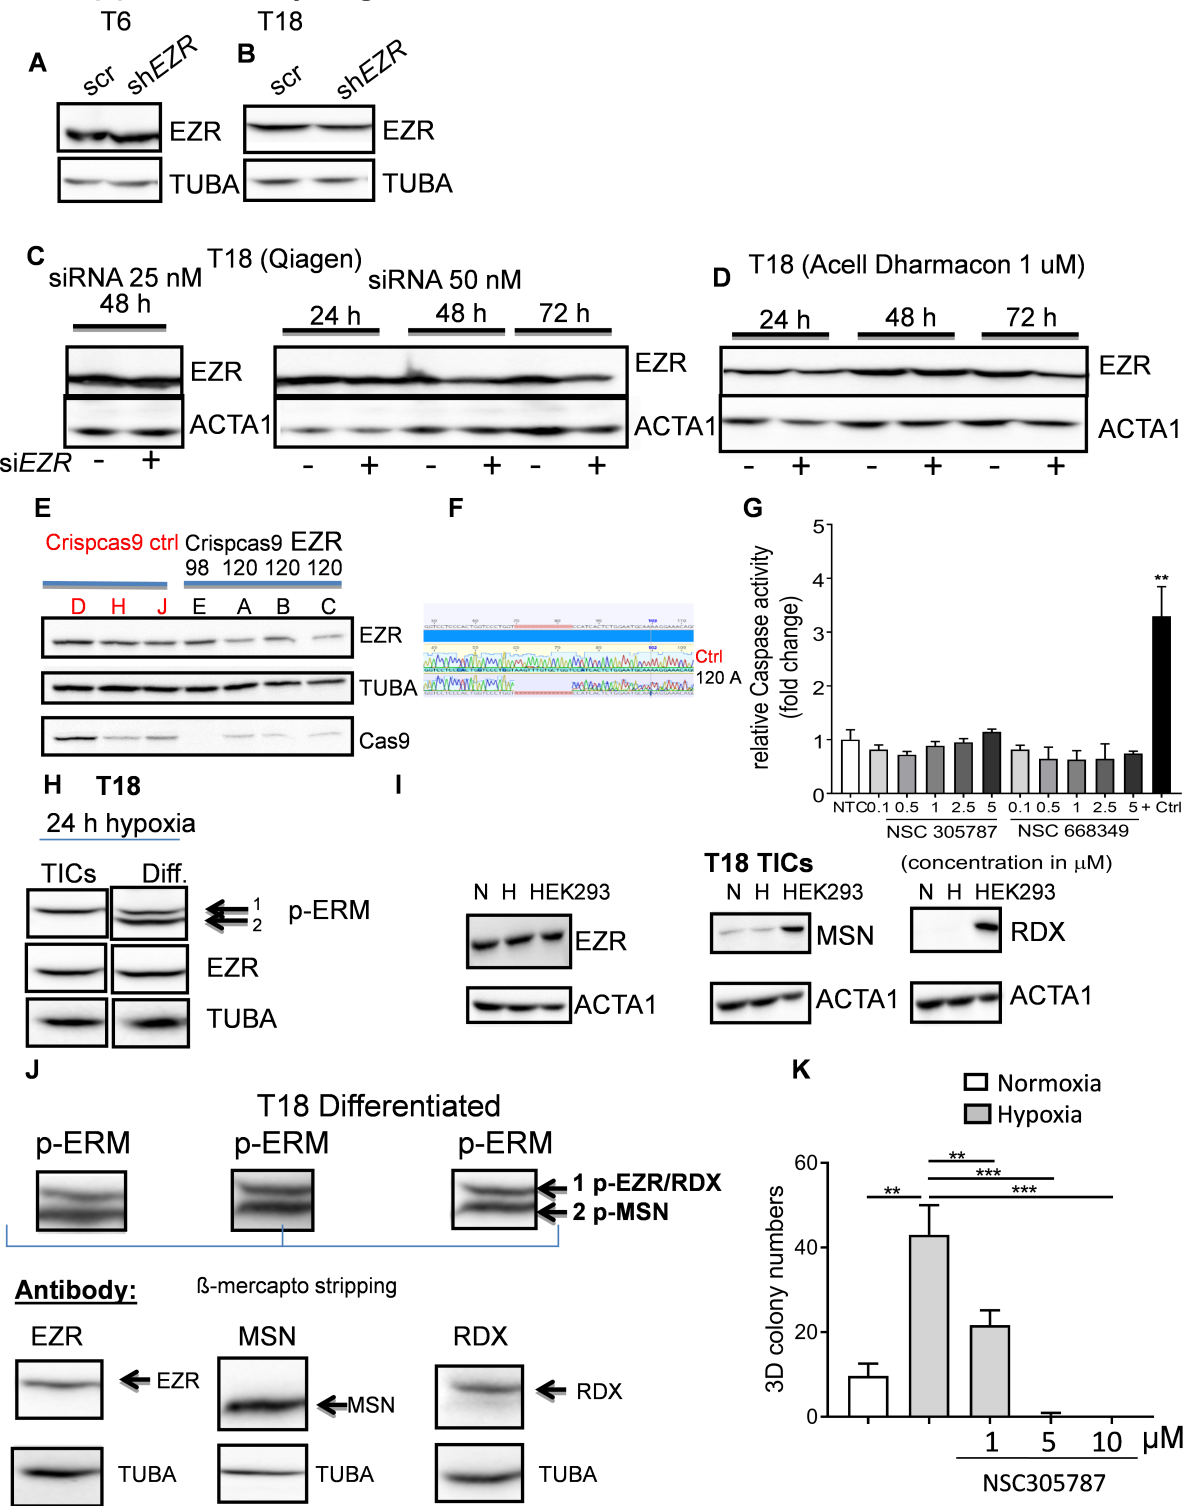

Supplement: Supplementary file 2 [file 1 › SFigure 5.pdf]

# Supplementary Figure S6

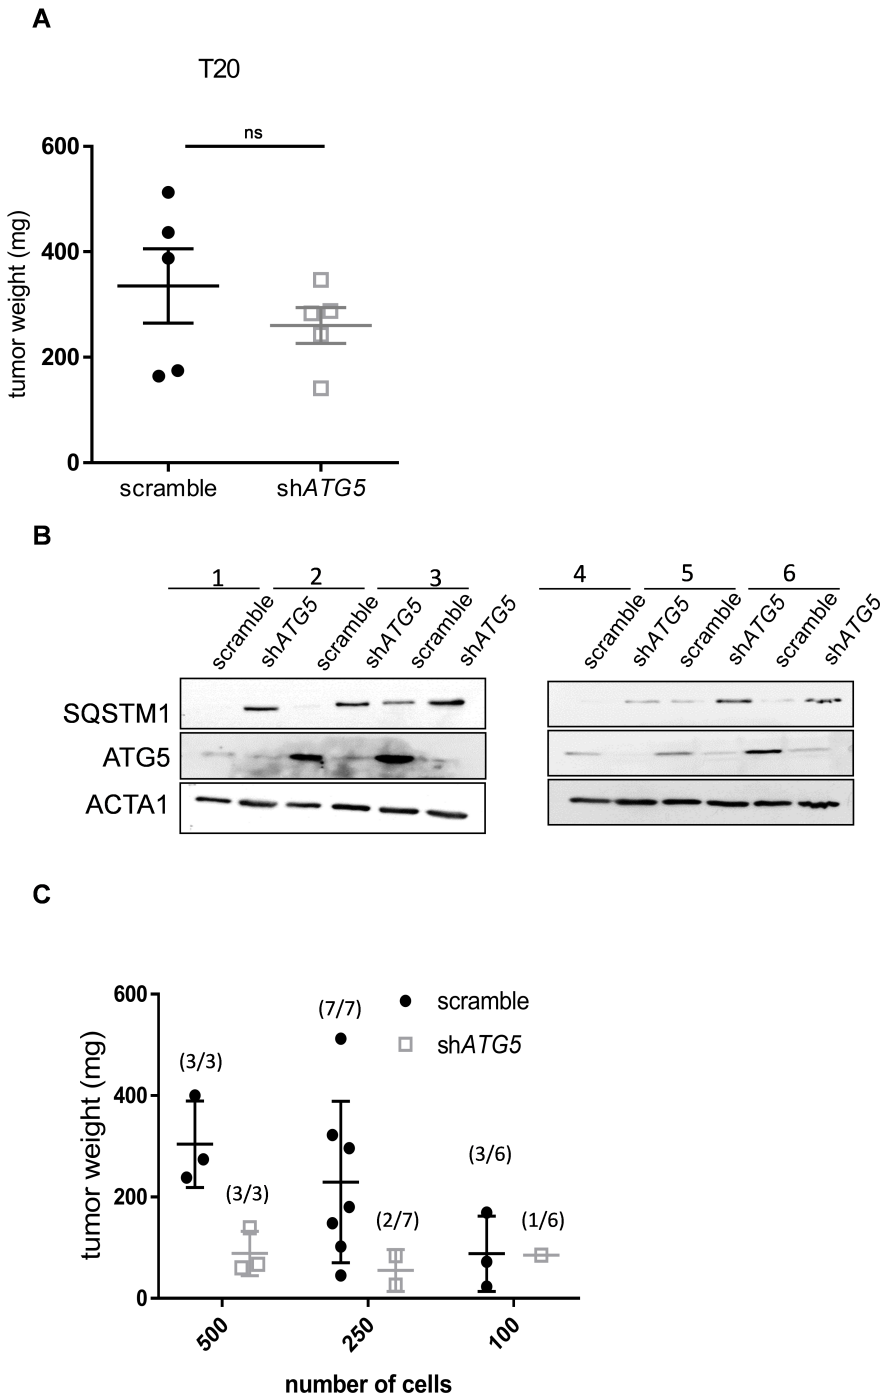

Supplement: Supplementary file 2 [file 1 › SFigure 6.pdf]

Supplementary Figure S7

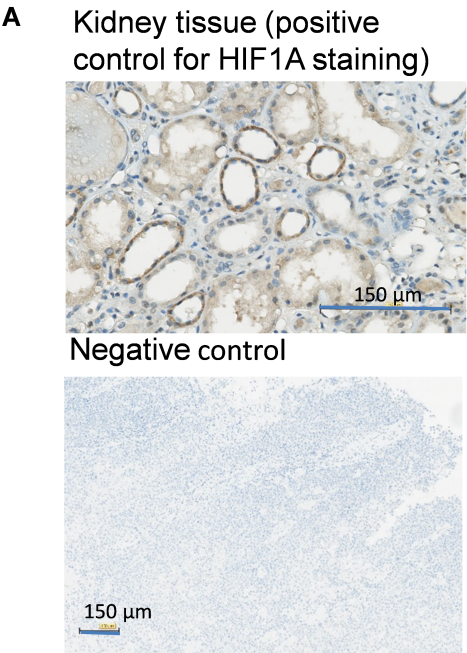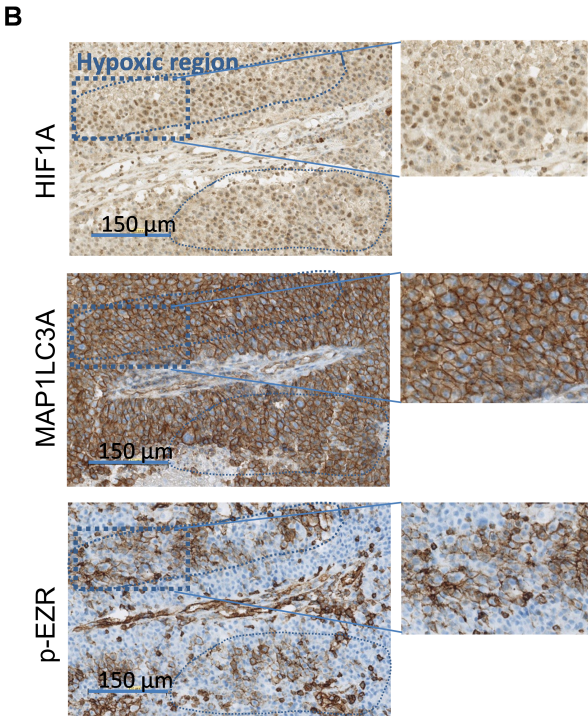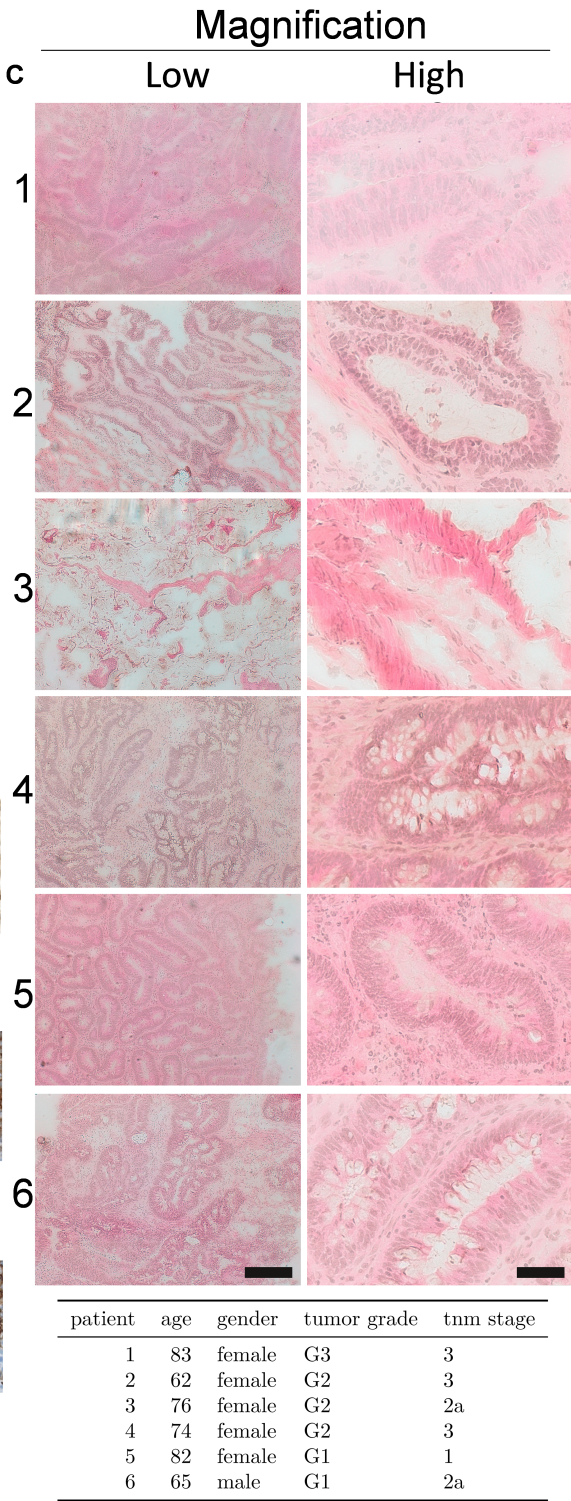

Supplement: Supplementary file 6 [file 1]
